# Supplementary material
Source: PubMed Central journal article supplement (PMC2883523)
Supplement: Supp_Data.pdf [file Supp_Data.pdf]

SUPPLEMENTARY TABLE 1. A/NEW CALEDONIA/20/99  
INFLUENZA (H1N1) VIRUS: PROTEINS SCREENED

| Protein                 | Size (aa) | Number of peptides <sup>a</sup> |
|-------------------------|-----------|---------------------------------|
| Hemagglutinin           | 565       | 94                              |
| Nonstructural protein 1 | 230       | 37                              |
| Nucleocapsid protein    | 498       | 82                              |
| Neuraminidase           | 470       | 78                              |
| Matrix protein 1        | 252       | 41                              |

<sup>a</sup>Peptides screened were 17mers overlapping by 11 amino acids obtained through the NIH Biodefense and Emerging Infections Resources Repository, NIAID, NIH.

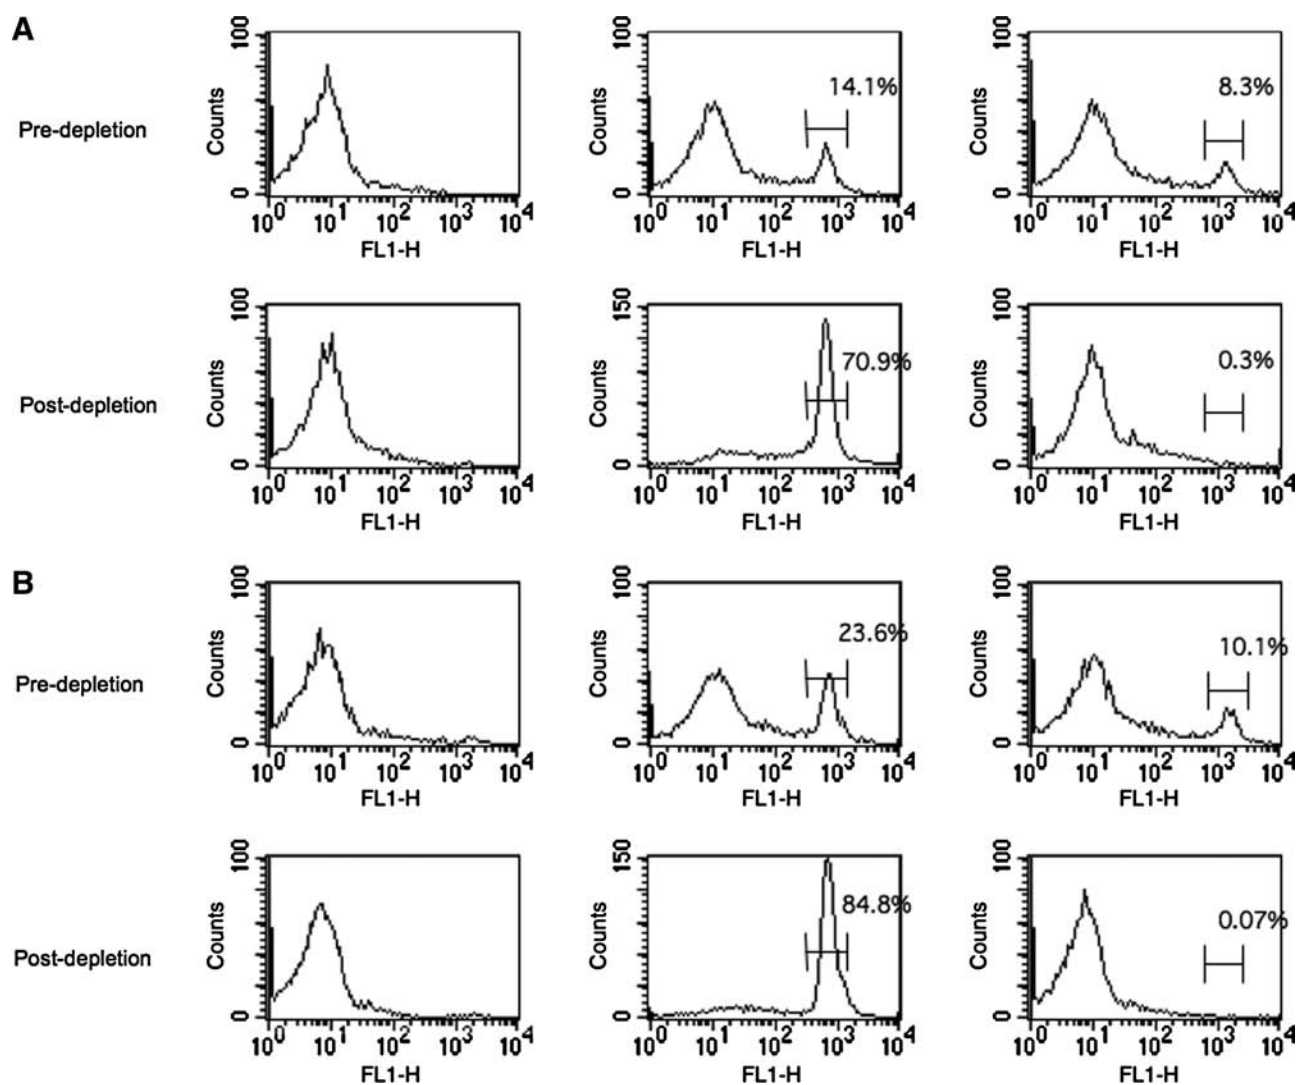

**SUPPLEMENTARY FIG. 1.** Example of flow cytometry demonstrating the enrichment of CD4 T cells following antibody and complement mediated lysis of CD8 T cells and APC. This figure is representative of the results from the CD4 enrichment of splenocytes. (A) Pre- and post-depletion results in C57BL/10 mice. (B) Pre- and post-depletion staining in SJL mice. There were <1% contaminating CD8<sup>+</sup> T cells present in any sample.

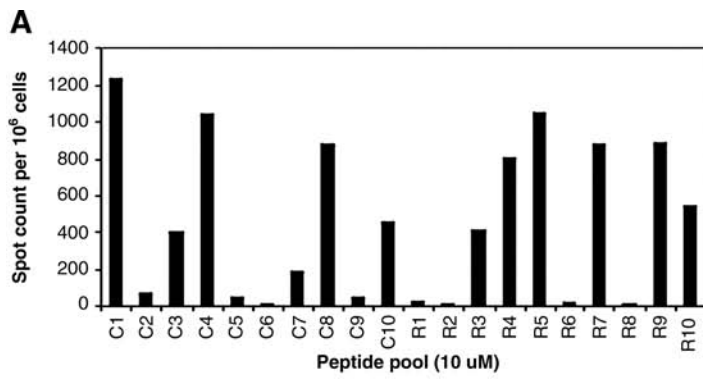

**B**

|     | C1 | C2 | C3 | C4 | C5 | C6 | C7 | C8 | C9 | C10 |
|-----|----|----|----|----|----|----|----|----|----|-----|
| R1  | 1  | 7  | 13 | 19 | 25 |    | 63 |    | 49 | 55  |
| R2  | 61 | 67 | 73 | 79 | 34 |    | 3  | 9  | 15 |     |
| R3  |    |    | 48 | 2  | 8  | 14 | 20 | 26 | 32 | 38  |
| R4  | 53 | 59 | 65 | 71 | 77 | 31 | 37 | 43 |    |     |
| R5  | 27 | 33 | 39 | 45 | 51 | 57 |    | 69 | 75 | 81  |
| R6  | 36 | 42 |    | 54 | 60 | 66 | 72 | 78 |    | 4   |
| R7  | 10 | 16 | 22 | 28 |    | 40 | 46 | 52 | 58 | 64  |
| R8  | 70 | 76 | 82 |    |    | 6  | 12 | 18 | 24 | 30  |
| R9  | 44 | 50 | 56 | 62 | 68 | 74 | 80 |    |    |     |
| R10 |    |    | 5  | 11 | 17 | 23 | 29 | 35 | 41 | 47  |

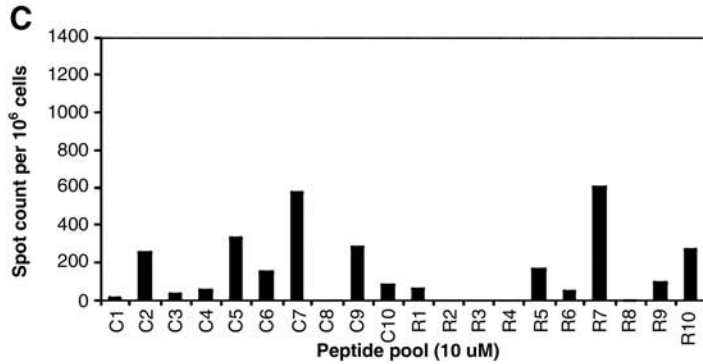

**D**

|     | C1 | C2 | C3 | C4 | C5 | C6 | C7 | C8 | C9 | C10 |
|-----|----|----|----|----|----|----|----|----|----|-----|
| R1  | 1  | 7  | 13 | 19 | 25 |    | 63 |    | 49 | 55  |
| R2  | 61 | 67 | 73 | 79 | 34 |    | 3  | 9  | 15 |     |
| R3  |    |    | 48 | 2  | 8  | 14 | 20 | 26 | 32 | 38  |
| R4  | 53 | 59 | 65 | 71 | 77 | 31 | 37 | 43 |    |     |
| R5  | 27 | 33 | 39 | 45 | 51 | 57 |    | 69 | 75 | 81  |
| R6  | 36 | 42 |    | 54 | 60 | 66 | 72 | 78 |    | 4   |
| R7  | 10 | 16 | 22 | 28 |    | 40 | 46 | 52 | 58 | 64  |
| R8  | 70 | 76 | 82 |    |    | 6  | 12 | 18 | 24 | 30  |
| R9  | 44 | 50 | 56 | 62 | 68 | 74 | 80 |    |    |     |
| R10 |    |    | 5  | 11 | 17 | 23 | 29 | 35 | 41 | 47  |

**SUPPLEMENTARY FIG. 2.** Screening of the NP protein utilizing a peptide pooling matrix approach. A matrix of pooled 17-mer peptides that contained no overlapping peptides in either rows or columns was constructed, as shown in panels **B** and **D**. Peptides were considered for further analysis if they were a member of both a positive row and column (shown in gray), with no row or column containing  $>40$  spots per  $10^6$  CD4-enriched T cells excluded. All matrices were screened at least twice to ensure that no potential epitopes were falsely considered negative. The results from the NP matrix in both C57BL/10 (panels **A** and **B**), and SJL (panels **C** and **D**) mice are shown as examples. Panels **A** and **C** demonstrate the results from representative EliSpot assays, while panels **B** and **D** show the subsequent analysis of the matrix.
